# Supplementary material for: Aromatic Potential and Bioactivity of Cork Stoppers and Cork By-Products
Source: PubMed Central journal article supplement (PMC7073939; doi:10.3390/foods9020133), 2020-01-28
Supplement: foods-09-00133-s001.pdf [file foods-09-00133-s001.pdf]

**Table S1.** Size of cork granulates (mm) used in this study (n = 20).

| <b>CORK GRANULATES</b> |      |      |      |
|------------------------|------|------|------|
| <b>A (high size)</b>   |      |      |      |
| 6.3                    | 10.4 | 7.2  | 9.1  |
| 11.7                   | 10   | 9.2  | 6.9  |
| 12.7                   | 14.3 | 8.3  | 10.8 |
| 6.1                    | 11.7 | 7.7  | 7.7  |
| 8.6                    | 10.4 | 6.9  | 7.7  |
| <b>B (medium size)</b> |      |      |      |
| 3                      | 1.6  | 3.4  | 2.2  |
| 3.1                    | 5.9  | 3.8  | 2.3  |
| 3.8                    | 2.4  | 2.7  | 1.6  |
| 5.3                    | 2.9  | 2.7  | 2.7  |
| 2                      | 3.7  | 4.4  | 3.7  |
| <b>C (low size)</b>    |      |      |      |
| 1.2                    | 1.7  | 0.98 | 1.03 |
| 1.6                    | 0.85 | 1.1  | 1.4  |
| 2                      | 0.86 | 1.1  | 1.6  |
| 1.5                    | 1.5  | 1.1  | 1.9  |
| 1.5                    | 1.7  | 1.3  | 1.3  |

**Table S2.** Individual aromatic composition in the studied granulates and corks at 3, 5 and 15 days of maceration.

| MACERATION TIME         | 3 DAYS         |              |                 |              |                |              |                |              |                |              |                |              |
|-------------------------|----------------|--------------|-----------------|--------------|----------------|--------------|----------------|--------------|----------------|--------------|----------------|--------------|
|                         | GRANULATES     |              |                 |              |                |              | CORKS          |              |                |              |                |              |
|                         | A              |              | B               |              | C              |              | A              |              | B              |              | C              |              |
|                         | $\bar{x}$      | SD ( $\pm$ ) | $\bar{x}$       | SD ( $\pm$ ) | $\bar{x}$      | SD ( $\pm$ ) | $\bar{x}$      | SD ( $\pm$ ) | $\bar{x}$      | SD ( $\pm$ ) | $\bar{x}$      | SD ( $\pm$ ) |
| Vanillin                | 84.55 d        | 1.63         | 93.47 e         | 0.91         | 75.54 c        | 1.64         | 12.41 a        | 0.55         | 21.65 b        | 0.07         | 14.85 a        | 0.16         |
| Acetovanillone          | 7.29 c         | 0.06         | 8.96 e          | 0.04         | 7.90 d         | 0.14         | 0.61 a         | 0.08         | 1.44 b         | 0.19         | 1.30 b         | 0.10         |
| <b>Vainillins</b>       | <b>91.84 d</b> | <b>1.11</b>  | <b>102.44 e</b> | <b>0.61</b>  | <b>83.44 c</b> | <b>1.06</b>  | <b>13.02 a</b> | <b>0.34</b>  | <b>23.09 b</b> | <b>0.08</b>  | <b>16.14 a</b> | <b>0.04</b>  |
| Guaicol                 | 0.46 d         | 0.05         | 0.15 bc         | 0.02         | 0.17 c         | 0.01         | 0.12 abc       | 0.03         | 0.04 ab        | 0.01         | 0.03 a         | 0.00         |
| 4-vinylguaicol          | 7.71 b         | 0.18         | 9.27 c          | 0.28         | 6.98 b         | 0.26         | 1.02 a         | 0.11         | 0.80 a         | 0.18         | 0.44 a         | 0.18         |
| Eugenol                 | 0.09 bc        | 0.01         | 0.10 bc         | 0.00         | 0.14 c         | 0.04         | 0.03 ab        | 0.01         | 0.03 ab        | 0.01         | 0.01 a         | 0.01         |
| Isoeugenol              | 0.30 ab        | 0.05         | 0.97 c          | 0.33         | 0.74 c         | 0.04         | 0.06 a         | 0.02         | 0.10 a         | 0.05         | 0.08 a         | 0.02         |
| Cerulignol              | 0.76 b         | 0.15         | 1.54 c          | 0.13         | 0.22 a         | 0.02         | 0.04 a         | 0.00         | 0.12 a         | 0.03         | 0.09 a         | 0.04         |
| <b>Volatile phenols</b> | <b>9.32 c</b>  | <b>0.07</b>  | <b>12.04 d</b>  | <b>0.15</b>  | <b>8.25 b</b>  | <b>0.10</b>  | <b>1.26 a</b>  | <b>0.04</b>  | <b>1.09 a</b>  | <b>0.07</b>  | <b>0.65 a</b>  | 0.02         |
| Benzaldehyde            | 0.06 a         | 0.01         | 0.06 a          | 0.01         | 0.21 c         | 0.01         | 0.12 b         | 0.02         | 0.03 a         | 0.01         | 0.03 a         | 0.01         |
| Nonennal                | 0.17 b         | 0.00         | 0.29 c          | 0.02         | 0.12 b         | 0.02         | 0.03 a         | 0.01         | 0.36 c         | 0.04         | 0.32 c         | 0.01         |
| Phenylacetaldehyde      | 0.27 a         | 0.04         | 0.18 a          | 0.07         | 3.66 b         | 0.50         | 0.05 a         | 0.02         | 0.05 a         | 0.03         | 0.05 a         | 0.02         |
| <b>Aldehydes</b>        | <b>0.49 a</b>  | <b>0.02</b>  | <b>0.53 a</b>   | <b>0.04</b>  | <b>3.99 b</b>  | <b>0.28</b>  | <b>0.20 a</b>  | <b>0.01</b>  | <b>0.45 a</b>  | <b>0.02</b>  | <b>0.40 a</b>  | <b>0.01</b>  |
| Phenylethyl alcohol     | 0.14 ab        | 0.18         | 0.22 ab         | 0.02         | 0.34 b         | 0.05         | 0.01 a         | 0.01         | 0.03 a         | 0.01         | 0.03 a         | 0.01         |
| Benzyl alcohol          | 0.08 a         | 0.01         | 0.12 a          | 0.01         | 0.05 a         | 0.02         | 0.10 a         | 0.01         | 0.13 a         | 0.06         | 0.07 a         | 0.05         |
| <b>Alcohols</b>         | <b>0.22 a</b>  | <b>0.12</b>  | <b>0.35 a</b>   | <b>0.00</b>  | <b>0.39 a</b>  | <b>0.03</b>  | <b>0.11 a</b>  | <b>0.00</b>  | <b>0.15 a</b>  | <b>0.04</b>  | <b>0.09 a</b>  | <b>0.03</b>  |
| Camphor                 | 0.16 a         | 0.10         | 0.07 a          | 0.00         | 0.01 a         | 0.01         | 0.00 a         | 0.00         | 0.00 a         | 0.00         | 0.00 a         | 0.00         |

|                       |                 |             |                 |             |                |             |                |             |                |             |                |             |
|-----------------------|-----------------|-------------|-----------------|-------------|----------------|-------------|----------------|-------------|----------------|-------------|----------------|-------------|
| Borneol               | 0.11 b          | 0.04        | 0.05 ab         | 0.02        | 0.07 ab        | 0.04        | 0.00 a         | 0.00        | 0.00 a         | 0.00        | 0.00 a         | 0.00        |
| 4-terpineol           | 0.12 a          | 0.07        | 0.08 a          | 0.03        | 0.05 a         | 0.03        | 0.04 a         | 0.01        | 0.14 a         | 0.02        | 0.09 a         | 0.01        |
| $\alpha$ -terpineol   | 0.06 a          | 0.01        | 0.06 a          | 0.01        | 0.20 b         | 0.04        | 0.01 a         | 0.01        | 0.03 a         | 0.00        | 0.02 a         | 0.02        |
| <b>Terpenols</b>      | <b>0.45 b</b>   | <b>0.04</b> | <b>0.25 ab</b>  | <b>0.01</b> | <b>0.33 ab</b> | <b>0.01</b> | <b>0.05 a</b>  | <b>0.01</b> | <b>0.18 ab</b> | <b>0.01</b> | <b>0.11 ab</b> | <b>0.01</b> |
| $\gamma$ -nonalactone | 0.04 a          | 0.03        | 0.07 a          | 0.04        | 0.03 a         | 0.01        | 0.03 a         | 0.00        | 0.07 a         | 0.05        | 0.05 a         | 0.02        |
| <b>Lactones</b>       | <b>0.04 a</b>   | <b>0.03</b> | <b>0.07 a</b>   | <b>0.04</b> | <b>0.03 a</b>  | <b>0.01</b> | <b>0.03 a</b>  | <b>0.00</b> | <b>0.07 a</b>  | <b>0.05</b> | <b>0.05 a</b>  | <b>0.02</b> |
| Nonanoic acid         | 0.46 a          | 0.05        | 0.54 a          | 0.08        | 0.34 a         | 0.13        | 0.36 a         | 0.01        | 0.54 a         | 0.05        | 0.56 a         | 0.05        |
| Vanillic acid         | 0.43 cd         | 0.05        | 0.58 d          | 0.07        | 0.32 bc        | 0.07        | 0.16 ab        | 0.05        | 0.14 ab        | 0.04        | 0.07 a         | 0.00        |
| Octanoic acid         | 0.30 a          | 0.05        | 0.43 a          | 0.15        | 0.27 a         | 0.09        | 0.24 a         | 0.04        | 0.29 a         | 0.01        | 0.28 a         | 0.07        |
| Dodecanoic acid       | 0.03 b          | 0.01        | 0.03 b          | 0.00        | 0.07 c         | 0.00        | 0.00 a         | 0.00        | 0.00 a         | 0.00        | 0.00 a         | 0.00        |
| Benceneacetic acid    | 0.76 c          | 0.06        | 1.05 b          | 0.07        | 0.55 d         | 0.08        | 0.00 a         | 0.00        | 0.00 a         | 0.00        | 0.00 a         | 0.00        |
| <b>Fatty acids</b>    | <b>1.98 bc</b>  | <b>0.02</b> | <b>2.63 c</b>   | <b>0.05</b> | <b>1.54 ab</b> | <b>0.05</b> | <b>0.75 a</b>  | <b>0.03</b> | <b>0.97 a</b>  | <b>0.02</b> | <b>0.91 a</b>  | 0.01        |
| Furfural              | 0.08 b          | 0.03        | 0.02 a          | 0.02        | 0.02 a         | 0.02        | 0.001 a        | 0.00        | 0.001 a        | 0.01        | 0.005 a        | 0.01        |
| <b>Furans</b>         | <b>0.08 b</b>   | <b>0.03</b> | <b>0.02 a</b>   | <b>0.02</b> | <b>0.02 a</b>  | <b>0.02</b> | <b>0.001 a</b> | <b>0.00</b> | <b>0.001 a</b> | <b>0.01</b> | <b>0.005 a</b> | <b>0.01</b> |
| <b>Totals</b>         | <b>104.42 b</b> | <b>0.38</b> | <b>118.33 c</b> | <b>0.20</b> | <b>97.98 b</b> | <b>0.36</b> | <b>15.43 a</b> | <b>0.12</b> | <b>26.00 a</b> | <b>0.03</b> | <b>18.36 a</b> | <b>0.02</b> |

| MACERATION TIME   | 5 DAYS          |             |                 |             |                |             |                |             |                |             |                |             |
|-------------------|-----------------|-------------|-----------------|-------------|----------------|-------------|----------------|-------------|----------------|-------------|----------------|-------------|
|                   | GRANULATES      |             |                 |             |                |             | CORKS          |             |                |             |                |             |
|                   | A               |             | B               |             | C              |             | A              |             | B              |             | C              |             |
| $\bar{x}$         | SD ( $\pm$ )    | $\bar{x}$   | SD ( $\pm$ )    | $\bar{x}$   | SD ( $\pm$ )   | $\bar{x}$   | SD ( $\pm$ )   | $\bar{x}$   | SD ( $\pm$ )   | $\bar{x}$   | SD ( $\pm$ )   |             |
| Vanillin          | 167.85 f        | 3.14        | 90.93 e         | 0.81        | 78.66 d        | 0.38        | 29.43 c        | 0.90        | 19.33 b        | 1.51        | 9.33 a         | 0.90        |
| Acetovanillone    | 14.32 c         | 0.16        | 9.23 b          | 0.43        | 9.41 b         | 0.22        | 1.02 a         | 0.03        | 1.13 a         | 0.05        | 0.82 a         | 0.02        |
| <b>Vainillins</b> | <b>182.16 f</b> | <b>2.10</b> | <b>100.16 e</b> | <b>0.27</b> | <b>88.08 d</b> | <b>0.12</b> | <b>30.46 c</b> | <b>0.61</b> | <b>20.47 b</b> | <b>1.03</b> | <b>10.15 a</b> | <b>0.63</b> |
| Guaicol           | 2.52 d          | 0.11        | 5.01 e          | 0.40        | 0.21 ab        | 0.03        | 0.85 bc        | 0.12        | 1.01 c         | 0.12        | 0.09 a         | 0.06        |

|                         |                |             |                |             |                |             |               |             |               |             |               |             |
|-------------------------|----------------|-------------|----------------|-------------|----------------|-------------|---------------|-------------|---------------|-------------|---------------|-------------|
| 4-vinylguaicol          | 19.76 d        | 0.57        | 23.29 e        | 0.58        | 8.50 c         | 0.62        | 2.44 a        | 0.10        | 4.33 b        | 0.13        | 1.04 a        | 0.09        |
| Eugenol                 | 0.24 c         | 0.03        | 0.09 ab        | 0.04        | 0.16 bc        | 0.05        | 0.03 a        | 0.01        | 0.01 a        | 0.01        | 0.02 a        | 0.02        |
| Isoeugenol              | 2.06 d         | 0.20        | 1.58 c         | 0.12        | 0.98 b         | 0.03        | 0.24 a        | 0.04        | 0.13 a        | 0.00        | 0.18 a        | 0.01        |
| Cerulignol              | 2.18 d         | 0.02        | 1.32 c         | 0.07        | 0.42 b         | 0.11        | 0.24 ab       | 0.01        | 0.21 ab       | 0.01        | 0.15 a        | 0.03        |
| <b>Volatile phenols</b> | <b>26.77 d</b> | <b>0.23</b> | <b>31.30 e</b> | <b>0.24</b> | <b>10.27 c</b> | <b>0.25</b> | <b>3.79 b</b> | <b>0.05</b> | <b>5.69 b</b> | <b>0.06</b> | <b>1.47 a</b> | <b>0.03</b> |
| Benzaldehyde            | 0.08 ab        | 0.03        | 0.06 a         | 0.01        | 0.13 b         | 0.01        | 0.03 a        | 0.01        | 0.02 a        | 0.02        | 0.02 a        | 0.01        |
| Nonennal                | 0.47 b         | 0.04        | 0.29 a         | 0.01        | 0.15 a         | 0.02        | 0.54 b        | 0.08        | 0.25 a        | 0.02        | 0.20 a        | 0.05        |
| Phenylacetaldehyde      | 0.46 a         | 0.06        | 0.28 a         | 0.03        | 2.75 b         | 0.50        | 0.13 a        | 0.06        | 0.13 a        | 0.05        | 0.08 a        | 0.03        |
| <b>Aldehydes</b>        | <b>1.01 a</b>  | <b>0.01</b> | <b>0.63 a</b>  | <b>0.01</b> | <b>3.03 b</b>  | <b>0.28</b> | <b>0.70 a</b> | <b>0.04</b> | <b>0.40 a</b> | <b>0.02</b> | <b>0.31 a</b> | <b>0.02</b> |
| Phenylethyl alcohol     | 0.12 a         | 0.06        | 0.12 a         | 0.03        | 0.38 b         | 0.06        | 0.34 b        | 0.01        | 0.25 ab       | 0.02        | 0.79 c        | 0.02        |
| Benzyl alcohol          | 0.13 a         | 0.01        | 0.11 a         | 0.02        | 0.06 a         | 0.00        | 0.09 a        | 0.01        | 0.08 a        | 0.02        | 0.06 a        | 0.04        |
| <b>Alcohols</b>         | <b>0.25 a</b>  | <b>0.04</b> | <b>0.23 a</b>  | <b>0.01</b> | <b>0.44 b</b>  | <b>0.04</b> | <b>0.44 b</b> | <b>0.00</b> | <b>0.33 c</b> | <b>0.00</b> | <b>0.85 d</b> | <b>0.02</b> |
| Camphor                 | 0.23 b         | 0.05        | 0.08 a         | 0.03        | 0.05 a         | 0.03        | 0.00 a        | 0.00        | 0.00 a        | 0.00        | 0.00 a        | 0.00        |
| Borneol                 | 0.20 b         | 0.05        | 0.08 a         | 0.03        | 0.04 a         | 0.01        | 0.00 a        | 0.00        | 0.00 a        | 0.00        | 0.00 a        | 0.00        |
| 4-terpineol             | 0.07 a         | 0.01        | 0.05 a         | 0.02        | 0.05 a         | 0.02        | 0.07 a        | 0.05        | 0.06 a        | 0.01        | 0.05 a        | 0.03        |
| $\alpha$ -terpineol     | 0.12 c         | 0.01        | 0.08 bc        | 0.03        | 0.04 ab        | 0.01        | 0.002 a       | 0.00        | 0.003 a       | 0.00        | 0.002 a       | 0.00        |
| <b>Terpenols</b>        | <b>0.62 b</b>  | <b>0.02</b> | <b>0.29 a</b>  | <b>0.01</b> | <b>0.18 a</b>  | <b>0.01</b> | <b>0.07 a</b> | <b>0.02</b> | <b>0.06 a</b> | <b>0.00</b> | <b>0.06 a</b> | <b>0.01</b> |
| $\gamma$ -nonalactone   | 0.06 a         | 0.01        | 0.03 a         | 0.01        | 0.09 a         | 0.03        | 0.04 a        | 0.01        | 0.05 a        | 0.02        | 0.05 a        | 0.03        |
| <b>Lactones</b>         | <b>0.06 a</b>  | <b>0.01</b> | <b>0.03 a</b>  | <b>0.01</b> | <b>0.09 a</b>  | <b>0.03</b> | <b>0.04 a</b> | <b>0.01</b> | <b>0.05 a</b> | <b>0.02</b> | <b>0.05 a</b> | <b>0.03</b> |
| Nonanoic acid           | 0.55 b         | 0.07        | 0.43 b         | 0.05        | 0.51 b         | 0.07        | 0.22 a        | 0.03        | 0.18 a        | 0.02        | 0.12 a        | 0.03        |
| Vanillic acid           | 0.86 a         | 0.16        | 0.62 a         | 0.02        | 0.43 a         | 0.14        | 1.03 a        | 0.32        | 0.51 a        | 0.02        | 1.95 b        | 0.07        |
| Octanoic acid           | 0.29 a         | 0.02        | 0.23 a         | 0.05        | 0.27 a         | 0.04        | 3.38 c        | 0.49        | 2.31 b        | 0.04        | 6.24 d        | 0.13        |
| Dodecanoic acid         | 0.13 c         | 0.00        | 0.09 bc        | 0.02        | 0.04 ab        | 0.03        | 0.00 a        | 0.00        | 0.00 a        | 0.00        | 0.00 a        | 0.00        |
| Benceneacetic acid      | 1.04 a         | 0.06        | 1.00 a         | 0.10        | 0.74 a         | 0.18        | 3.23 d        | 0.14        | 1.84 b        | 0.20        | 2.42 c        | 0.13        |

|                    |                 |             |                 |             |                 |             |                |             |                |             |                 |             |
|--------------------|-----------------|-------------|-----------------|-------------|-----------------|-------------|----------------|-------------|----------------|-------------|-----------------|-------------|
| <b>Fatty acids</b> | <b>2.86 a</b>   | <b>0.06</b> | <b>2.37 a</b>   | <b>0.03</b> | <b>2.00 a</b>   | <b>0.06</b> | <b>7.86 c</b>  | <b>0.21</b> | <b>4.84 b</b>  | <b>0.08</b> | <b>10.74 d</b>  | <b>0.06</b> |
| Furfural           | 0.17 b          | 0.01        | 0.09 ab         | 0.02        | 0.02 ab         | 0.02        | 0.00 a         | 0.00        | 0.00 a         | 0.00        | 0.010 ab        | 0.09        |
| <b>Furans</b>      | <b>0.17 b</b>   | <b>0.01</b> | <b>0.09 ab</b>  | <b>0.02</b> | <b>0.02 ab</b>  | <b>0.02</b> | <b>0.00 a</b>  | <b>0.00</b> | <b>0.00 a</b>  | <b>0.00</b> | <b>0.010 ab</b> | <b>0.09</b> |
| <b>Totals</b>      | <b>213.92 c</b> | <b>0.73</b> | <b>135.09 b</b> | <b>0.11</b> | <b>104.10 b</b> | <b>0.11</b> | <b>43.35 a</b> | <b>0.21</b> | <b>31.84 a</b> | <b>0.36</b> | <b>23.72 a</b>  | <b>0.21</b> |

**15 DAYS**

| <b>MACERATION TIME</b>  | <b>GRANULATES</b> |              |                |              |                 |              | <b>CORKS</b>   |              |                |              |                |              |
|-------------------------|-------------------|--------------|----------------|--------------|-----------------|--------------|----------------|--------------|----------------|--------------|----------------|--------------|
|                         | <b>A</b>          |              | <b>B</b>       |              | <b>C</b>        |              | <b>A</b>       |              | <b>B</b>       |              | <b>C</b>       |              |
|                         | $\bar{x}$         | SD ( $\pm$ ) | $\bar{x}$      | SD ( $\pm$ ) | $\bar{x}$       | SD ( $\pm$ ) | $\bar{x}$      | SD ( $\pm$ ) | $\bar{x}$      | SD ( $\pm$ ) | $\bar{x}$      | SD ( $\pm$ ) |
| Vanillin                | 73.86 bc          | 1.37         | 79.84 c        | 2.96         | 71.53 b         | 0.39         | 32.01 a        | 1.85         | 29.95 a        | 0.22         | 27.35 a        | 0.06         |
| Acetovanillone          | 5.32 b            | 0.13         | 8.42 c         | 0.21         | 13.78 d         | 0.36         | 1.92 a         | 0.11         | 1.85 a         | 0.02         | 2.35 a         | 0.08         |
| <b>Vainillins</b>       | <b>79.18 b</b>    | <b>0.88</b>  | <b>88.26 c</b> | <b>1.94</b>  | <b>85.30 bc</b> | <b>0.02</b>  | <b>33.93 a</b> | <b>1.23</b>  | <b>31.80 a</b> | <b>0.13</b>  | <b>29.70 a</b> | <b>0.01</b>  |
| Guaicol                 | 0.29 abc          | 0.06         | 0.46 c         | 0.09         | 0.41 bc         | 0.06         | 0.18 ab        | 0.02         | 0.11 a         | 0.07         | 0.08 a         | 0.03         |
| 4-vinyguaicol           | 4.10 c            | 0.14         | 11.12 d        | 0.16         | 10.91 d         | 0.30         | 1.41 a         | 0.10         | 2.33 b         | 0.05         | 1.31 a         | 0.06         |
| Eugenol                 | 0.15 abc          | 0.02         | 0.28 bc        | 0.07         | 0.29 c          | 0.10         | 0.08 ab        | 0.03         | 0.03 a         | 0.00         | 0.03 a         | 0.00         |
| Isoeugenol              | 0.83 b            | 0.14         | 2.34 c         | 0.04         | 2.22 c          | 0.31         | 0.24 a         | 0.04         | 0.21 a         | 0.02         | 0.16 a         | 0.03         |
| Cerulignol              | 0.31 b            | 0.04         | 0.68 c         | 0.07         | 0.80 c          | 0.10         | 0.11 ab        | 0.03         | 0.09 a         | 0.01         | 0.06 a         | 0.00         |
| <b>Volatile phenols</b> | <b>5.67 c</b>     | <b>0.06</b>  | <b>14.89 d</b> | <b>0.05</b>  | <b>14.63 d</b>  | <b>0.12</b>  | <b>2.02 ab</b> | <b>0.03</b>  | <b>2.78 b</b>  | <b>0.03</b>  | <b>1.64 a</b>  | <b>0.02</b>  |
| Benzaldehyde            | 0.12 a            | 0.01         | 0.14 a         | 0.04         | 0.11 a          | 0.01         | 0.06 a         | 0.04         | 0.07 a         | 0.01         | 0.05 a         | 0.03         |
| Nonennal                | 0.17 a            | 0.04         | 0.23 a         | 0.05         | 0.25 a          | 0.02         | 0.20 a         | 0.00         | 0.29 a         | 0.02         | 0.28 a         | 0.02         |
| Phenylacetaldehyde      | 3.22 b            | 0.02         | 4.35 c         | 0.31         | 4.50 c          | 0.28         | 0.21 a         | 0.03         | 0.13 a         | 0.04         | 0.13 a         | 0.04         |
| <b>Aldehydes</b>        | <b>0.51 b</b>     | <b>0.01</b>  | <b>4.72 c</b>  | <b>0.15</b>  | <b>4.86 c</b>   | <b>0.16</b>  | <b>0.48 a</b>  | <b>0.02</b>  | <b>0.49 a</b>  | <b>0.01</b>  | <b>0.47 a</b>  | <b>0.01</b>  |

|                       |                |             |                 |             |                 |             |                |             |                |             |                |             |
|-----------------------|----------------|-------------|-----------------|-------------|-----------------|-------------|----------------|-------------|----------------|-------------|----------------|-------------|
| Phenylethyl alcohol   | 0.26 a         | 0.03        | 0.61 ab         | 0.08        | 0.88 bc         | 0.13        | 1.13 c         | 0.04        | 2.22 d         | 0.17        | 2.26 d         | 0.18        |
| Benzyl alcohol        | 0.12 a         | 0.07        | 0.10 a          | 0.04        | 0.11 a          | 0.04        | 0.06 a         | 0.04        | 0.06 a         | 0.03        | 0.07 a         | 0.05        |
| <b>Alcohols</b>       | <b>0.37 a</b>  | <b>0.03</b> | <b>0.71 a</b>   | <b>0.03</b> | <b>0.98 a</b>   | <b>0.06</b> | <b>1.19 a</b>  | <b>0.00</b> | <b>2.27 b</b>  | <b>0.09</b> | <b>2.32 b</b>  | <b>0.09</b> |
| Camphor               | 0.18 a         | 0.03        | 0.16 a          | 0.10        | 0.11 a          | 0.09        | 0.04 a         | 0.06        | 0.04 a         | 0.04        | 0.02 a         | 0.02        |
| Borneol               | 0.14 a         | 0.09        | 0.13 a          | 0.05        | 0.11 a          | 0.04        | 0.04 a         | 0.01        | 0.02 a         | 0.01        | 0.02 a         | 0.02        |
| 4-terpineol           | 0.04 a         | 0.03        | 0.06 a          | 0.06        | 0.06 a          | 0.06        | 0.02 a         | 0.02        | 0.02 a         | 0.03        | 0.02 a         | 0.03        |
| $\alpha$ -terpineol   | 0.07 a         | 0.00        | 0.09 a          | 0.01        | 0.11 a          | 0.03        | 0.04 a         | 0.06        | 0.01 a         | 0.02        | 0.01 a         | 0.01        |
| <b>Terpenols</b>      | <b>0.42 a</b>  | <b>0.04</b> | <b>0.44 a</b>   | <b>0.04</b> | <b>0.38 a</b>   | <b>0.03</b> | <b>0.14 a</b>  | <b>0.03</b> | <b>0.09 a</b>  | <b>0.01</b> | <b>0.07 a</b>  | <b>0.01</b> |
| $\gamma$ -nonalactone | 0.11 a         | 0.08        | 0.09 a          | 0.01        | 0.11 a          | 0.03        | 0.03 a         | 0.01        | 0.03 a         | 0.01        | 0.03 a         | 0.01        |
| <b>Lactones</b>       | <b>0.11 a</b>  | <b>0.08</b> | <b>0.09 a</b>   | <b>0.01</b> | <b>0.11 a</b>   | <b>0.03</b> | <b>0.03 a</b>  | <b>0.01</b> | <b>0.03 a</b>  | <b>0.01</b> | <b>0.03 a</b>  | <b>0.01</b> |
| Nonanoic acid         | 0.33 a         | 0.15        | 0.41 ab         | 0.08        | 0.67 b          | 0.09        | 0.44 ab        | 0.04        | 0.45 ab        | 0.03        | 0.42 ab        | 0.03        |
| Vanillic acid         | 0.27 ab        | 0.04        | 0.39 bc         | 0.03        | 0.52 c          | 0.07        | 0.13 a         | 0.05        | 0.12 a         | 0.07        | 0.09 a         | 0.02        |
| Octanoic acid         | 0.30 a         | 0.10        | 0.45 a          | 0.12        | 0.46 a          | 0.01        | 6.32 d         | 0.02        | 4.47 b         | 0.10        | 4.96 c         | 0.18        |
| Dodecanoic acid       | 0.00 a         | 0.00        | 0.00 a          | 0.00        | 0.02 a          | 0.02        | 0.22 b         | 0.08        | 0.18 ab        | 0.07        | 0.14 ab        | 0.06        |
| Benceneacetic acid    | 0.62 bc        | 0.16        | 1.69 d          | 0.10        | 0.99 c          | 0.20        | 0.14 a         | 0.02        | 0.18 ab        | 0.02        | 0.08 a         | 0.03        |
| <b>Fatty acids</b>    | <b>1.51 a</b>  | <b>0.07</b> | <b>2.95 b</b>   | <b>0.05</b> | <b>2.66 b</b>   | <b>0.07</b> | <b>7.26 d</b>  | <b>0.03</b> | <b>5.41 c</b>  | <b>0.03</b> | <b>5.69 c</b>  | <b>0.07</b> |
| Furfural              | 0.19 a         | 0.15        | 0.10 a          | 0.14        | 0.12 a          | 0.16        | 0.03 a         | 0.05        | 0.02 a         | 0.02        | 0.00 a         | 0.00        |
| <b>Furans</b>         | <b>0.19 a</b>  | <b>0.15</b> | <b>0.10 a</b>   | <b>0.14</b> | <b>0.12 a</b>   | <b>0.16</b> | <b>0.03 a</b>  | <b>0.05</b> | <b>0.02 a</b>  | <b>0.02</b> | <b>0.00 a</b>  | <b>0.00</b> |
| <b>Totals</b>         | <b>88.08 b</b> | <b>0.29</b> | <b>112.17 c</b> | <b>0.67</b> | <b>109.06 c</b> | <b>0.06</b> | <b>45.07 a</b> | <b>0.43</b> | <b>42.90 a</b> | <b>0.05</b> | <b>39.93 a</b> | <b>0.04</b> |
